## 21 **Abstract**

22 **Background:** Quality is the most important factor of satisfaction. However, the existing  
23 URRBMI index model lacks the decomposition of the connotation of perceived quality and  
24 cannot provide a reference for quality improvement and satisfaction promotion.

25 **Objective:** This study aims to construct a Satisfaction Index Model for Chinese Urban and  
26 Rural Residents Basic Medical Insurance (SIM-URRBMI) with accurate and detailed  
27 measurement of perceived quality and give a feasible and scientific suggestion for URRBMI  
28 or insurance for other countries in the world.

29 **Methods:** Based on the theoretical framework of The American Customer Satisfaction Index  
30 (ACSI), the connotation of perceived quality was refined by literature review and expert  
31 consultation to form a pool of alternative measurement variables. A three-stage randomized  
32 stratified cluster sampling was adopted to select the main decision makers for pupils'  
33 URRBMI in 8 primary schools from Changsha City. Both Classic Test Theory (CTT) and  
34 Item Response Theory (IRT) were used for selection of the measurement variables. The  
35 model's reliability and validity were tested using partial least square (PLS) related methods.

36 **Results:** A total of 1909 respondents who had insurance for their children were investigated  
37 with the initial questionnaire. The revised SIM-URRBMI consists of 11 latent variables and  
38 28 measurement variables with good reliability and validity. Among the three explanatory  
39 variables of public satisfaction, perceived quality had the largest total effect (0.737). The  
40 variable with greatest effect among the five first-order latent variables on perceived quality  
41 was quality of the medical insurance policy (0.472).

42 **Conclusions:** The revised SIM-URRBMI consists of 11 latent variables and 28 measurement

43 variables with good reliability and validity. It provides accurate assessment of perceived  
44 quality, which will greatly help performance improvement. Perceived quality is crucial to  
45 public satisfaction, especially, the most important aspects are policies regarding medical  
46 insurance reimbursement (basic coverage scope, coinsurance, deductible).

47 **Keywords:** Satisfaction index model; Basic Medical Insurance for Urban and Rural Residents;  
48 PLS-SEM; reliability; validity

## 49 **Introduction**

50 According to the 2015 World Health Organization (WHO) report, 6% of people in low-  
51 and middle-income countries are forced into extreme poverty because of medical  
52 expenditures. The Chinese government has been trying to establish a multilevel medical  
53 security system that is mainly based on the social basic medical insurance (BMI) schemes so  
54 as to protect the finances of individuals and households affected by illness and injury to some  
55 extent. In order to improve equity, sustainability, and efficiency, China has taken an initial  
56 step to integrate new cooperative medical scheme (NCMS) and urban resident-based basic  
57 medical insurance (URBMI) into the urban and rural residents' basic medical insurance  
58 scheme (URRBMI) [1-2].

59 Voluntary enrollment is a principle of URRBMI in China [3]. The enrollee's satisfaction  
60 and loyalty are crucial for the scheme's effective implementation and sustained development.  
61 Moreover, analyzing the enrollee's satisfaction with their health insurance and its influencing  
62 factors can help to shed light on current and future policy decision making [0, 4-4]. ACSI is  
63 one of the most widely used and representative quantitative measurement scales that shows  
64 the cause-and-effect relationship linking the casual variables of customer satisfaction to their  
65 consequent effect variable (customer loyalty) [6]. The model construction theory of ACSI  
66 provides an important reference for assessing the attitude and major improvement direction of  
67 the URRBMI from the perspective of insured participants. Using the ACSI as a basis and  
68 considering the Chinese social and cultural backgrounds, Peng et al. constructed a satisfaction  
69 index model for URRBMI that demonstrated good reliability and validity for satisfaction  
70 measurement[7-8]. There has been sufficient literature supporting the notion that perceived

71 quality may be the most worthwhile topic in service area satisfaction research, and  
72 satisfaction is mainly determined by perceived quality [6, 9-10]. However, Peng's model only  
73 adopted a few indicators to assess perceived quality, such as the overall quality assessment  
74 question, "how much help does the URRBMI bring to your child?". The lack of  
75 comprehensive and detailed aspects of URRBMI quality measurement greatly limit its further  
76 use in health reform [7-8].

77 In addition, since significant variation in economic and cultural backgrounds,  
78 accessibility of health services, and reimbursement policies existed between rural and urban  
79 residents before the URRBMI integration, it is necessary to consider the modeling  
80 heterogeneity from a theoretical and practical perspective to learn about the differences  
81 between groups of the insured (rural VS urban) [11].

82 The aims of this study are to revise and validate the SIM-URRBMI and identify the main  
83 quality aspects needed to be improved in order to provide a valid, reliable, and practical  
84 satisfaction measurement tool for URRBMI. In addition, using heterogeneity analysis, we aim  
85 to explore the differences in satisfaction mechanism between rural and urban participants.

## 86 **Materials and Methods**

### 87 **Participants and Sampling**

88 This study was conducted in Changsha, the capital city of the Chinese Province of Hunan,  
89 which completed the integration of NCMS and URBMI in 2011. A three-stage randomized  
90 stratified cluster sampling method was used to ensure a representative sample. The first stage  
91 was to randomly select two districts/counties from the nine districts/counties of Changsha  
92 City. The second stage was to randomly select two primary schools for each selected  
93 district/county. Finally, for each selected school, six classes (one class from each grade) were  
94 randomly selected, and questionnaires were sent home; the main family decision maker  
95 responsible for the pupils' URRBMI was instructed to fill out the questionnaires. The  
96 inclusion criteria were: a) had insurance for their children in 2017-2018; b) were inhabitants  
97 of a city or village in Changsha; c) were the main decision maker for pupils' URRBMI in their  
98 family. Both the students in the selected classes and the main family decision makers  
99 responsible for the pupils' URRBMI were subjects of investigation.

100 This study used a graded response model (GRM) to identify the measurement variables.  
101 In order to make the estimated parameters more accurate, a sample size of at least 500 cases is  
102 suitable. The selected samples of measurement variables included in this paper are 574 cases,  
103 which meet the requirements[13]. The sample size for model evaluation was calculated by the  
104 following formula,  $n \geq 50r^2 - 450r + 1100$  ( $r$  is the ratio of measurement variables to latent  
105 variables), which was based on the structural equation model research conducted by Westland  
106 et al. A minimum sample size of 216 was estimated. However, considering the need for  
107 subgroup analysis, a sample size of 1335 was obtained for model evaluation, which met the

108 estimated requirements [13-14].

## 109 **Ethical approval**

110 The study protocol was reviewed and approved by the Medical Ethics Committee at Xiang  
111 -ya School of Public Health, Central South University. Written informed consent was obtai  
112 ned for each participant who was the medical insurance decision maker of the family.

## 113 **Model construction**

### 114 **Phase 1**

115 The programmed decision process, a method to simultaneously develop a scale by  
116 nominal group (including pupils and their family members, local medical insurance  
117 management and service officers, experts of social medicine, health management, primary  
118 health care, health statistics, and epidemiology et al.) and focus group (1 project leader, 1  
119 professor of epidemiology and health statistics, 1 health insurance administration, and 4  
120 graduate students), was used to construct the model. With reference to the literature, we  
121 refined the "perceived quality" variable to five first-order latent variables, namely, overall  
122 quality, information quality, service quality, policy quality, and institution quality. The draft  
123 model consisted of 11 latent variables, including public expectations (PE), perceived quality  
124 (PQ) (which was a second-order latent variable and consisted of the five first-order latent  
125 variables), perceived value (PV), public satisfaction (PS), public complaints (PC), and public  
126 trust (PT). Public expectation, perceived quality, and perceived value were the explanatory  
127 variables of public satisfaction, while public complaints and public trust were the outcome  
128 variables of public satisfaction. Consistent with Peng's research, we used the term "public" as  
129 an alternative of the term "customer" and changed "customer loyalty" to "public trust". Then,  
130 an initial draft variable pool (29 variables) was generated (see Table 1). Since the path of



131 public complaints on public trust was not significant according to Peng’s research, this path

132 was not set in the initial draft SIM-URRBMI.

133

134

135

136 **Table 1** The latent and measurement variables of the initial SIM\_URRBMI

| Latent variable                                                | First-order latent variable | Measurement variables                                                    |
|----------------------------------------------------------------|-----------------------------|--------------------------------------------------------------------------|
| Public Expectation                                             |                             | Overall expectations (PE1)                                               |
|                                                                |                             | Expectations of URRBMI to ensure basic medical needs (PE2)               |
|                                                                |                             | Expectations of URRBMI to ensure personalization medical needs (PE3)     |
| Perceived Quality                                              | Overall quality             | Overall evaluation of quality (PQ1)                                      |
|                                                                | Information quality         | Availability of related information (PQ2)                                |
|                                                                |                             | The convenience of obtaining relevant information (PQ3)                  |
|                                                                | Service quality             | Service attitude of staff (PQ4)                                          |
|                                                                |                             | Clarity of staff’s interpretation of relevant policies (PQ5)             |
|                                                                |                             | Degree to meet the basic health insurance needs (PQ6)                    |
|                                                                | Policy quality              | Degree to meet the personalized health insurance needs (PQ7)             |
|                                                                |                             | Satisfaction with the payment level (PQ8)                                |
|                                                                |                             | Satisfaction with the scope of reimbursement (PQ9)                       |
|                                                                |                             | Satisfaction with the reimbursement proportion (PQ10)                    |
|                                                                |                             | Satisfaction with the deductible level (PQ11)                            |
|                                                                | Quality of institutions     | Satisfaction with the capitation (PQ12)                                  |
|                                                                |                             | Service quality of community or village committees for enrollment (PQ13) |
| Quality of payment bank or online payment platform (PQ14)      |                             |                                                                          |
| Service quality of authorized medical institution (PQ15)       |                             |                                                                          |
| Service quality of reimbursement in medical institution (PQ16) |                             |                                                                          |
| Service quality of authorized pharmacy (PQ17)                  |                             |                                                                          |
| Perceived Value                                                |                             | Quality according to the payment (PV1)                                   |
|                                                                |                             | Payment according to the quality (PV2)                                   |
| Public Satisfaction                                            |                             | Overall satisfaction (PS1)                                               |
|                                                                |                             | Service satisfaction to meets expectations (PS2)                         |

---

|                  |                                                     |
|------------------|-----------------------------------------------------|
|                  | Distance close to the ideal medical insurance (PS3) |
| Public Complaint | Complained informally about URRBMI (PC1)            |
|                  | Complained formally about URRBMI (PC2)              |
| Public Trust     | Willingness to positively evaluate (PT1)            |
|                  | Willingness to recommend (PT2)                      |

---

137

138       Based on expert consultation and literature review, the following path hypotheses were

139 established in the study (Fig 1):

140       **Fig1 The initial draft of SIM\_URRBMI**

141       Hypothesis 1: Public expectation has a direct positive impact on perceived quality,

142 perceived value, and public satisfaction;

143       Hypothesis 2: Perceived quality has a direct positive impact on perceived value and

144 public satisfaction;

145       Hypothesis 3: Perceived value has a direct positive impact on public satisfaction;

146       Hypothesis 4: Public satisfaction has a direct positive impact on public trust;

147       Hypothesis 5: Public satisfaction has a direct negative impact on public complaints.

## 148 **Phase 2**

149       Classic Test Theory (CTT) combined with Item Response Theory (IRT) was applied for

150 the measurement variable selection. If a measurement variable reached 3 or more deletion

151 criteria, it was considered for deletion. CTT is based on the true score model (true score plus

152 error), and its selection methods and criteria are shown in Table 2. The basic idea of IRT is to

153 use a mathematical function to characterize the relationship between the test response; in this

154 study,  $\theta$  refers to subject satisfaction with URRBMI. For the graded response model (GRM)

155 in this study, the discrimination parameter ( $a$ ), Threshold Parameter ( $b$ ), and Item Information

156 Function (*IIF*) were used to evaluate the quality of measurement variables. In addition, the  
157 Test Information Function (*TIF*) is a linear cumulative measurement of each item *IIF*; that is,  
158 the test information function on the  $\theta$  value is equal to the sum of its *IIFs*. It is generally  
159 considered that the quality of the model is good when the total of the information function is  
160 greater than 25, while the quality is considered poor when the information function is less  
161 than 16[15-16]. Since the initial draft of the SIM-URRBMI contains a total of 29  
162 measurement variables, the average information function amount of each measurement  
163 variable required ( $\bar{I}$ )  $\geq 0.55$  (16 / 29). The deletion criteria based on IRT are as follows: (1) *a*  
164 is less than 0.3; (2) *b* is out of range of (-4,4); and (3)  $\bar{I}$  is less than 0.55.

165

**Table 2 Item selection methods and criteria based on CTT**

| Methods                         | Criteria                                                                                                                                                                                                                                                                                  | Main test aspects             |
|---------------------------------|-------------------------------------------------------------------------------------------------------------------------------------------------------------------------------------------------------------------------------------------------------------------------------------------|-------------------------------|
| Floor effect                    | If 20% or more individuals choose the lowest score value, then delete it.                                                                                                                                                                                                                 | Sensitivity                   |
| Ceiling effect                  | If 20% or more individuals choose the highest score value, then delete it.                                                                                                                                                                                                                | Sensitivity                   |
| <i>t</i> -test                  | The measurement variables with no statistically significant difference were deleted ( $\alpha=0.05$ ) between 27% of the individual groups with the highest and lowest satisfaction scores.                                                                                               | Sensitivity or discrimination |
| Cronbach's $\alpha$ coefficient | If there is a large increase in the Cronbach's $\alpha$ of the dimension after the removal of an observed variable, then delete it.                                                                                                                                                       | Internal consistency          |
| Correlation analysis 1          | If the Pearson correlation coefficient of each measurement variable score and its corresponding dimension score is less than 0.6, then delete it.                                                                                                                                         | Sensitivity or representation |
| Correlation analysis 2          | If the Pearson correlation coefficient of each observed variable score and the initial model total score is less than 0.4, then delete it.                                                                                                                                                | Representation                |
| Stepwise regression             | Using the total score of each latent variable as the dependent variable, the stepwise regression analysis is performed with candidate measurement variables as independent variables ( $sl_e = 0.05$ , $sl_s = 0.10$ ). The measurement variable excluded from the model will be deleted. | Importance                    |
| Factor analysis                 | Measurement variables with a factor load less than 0.4 will be deleted.                                                                                                                                                                                                                   | Independence                  |

166

## 167 **Model validation**

168 The model validation includes two parts. The major reliability and validity tests were  
 169 used to evaluate the measurement model. The value of Cronbach's  $\alpha$  coefficient and the  
 170 composite reliability coefficient were greater than 0.7. It is considered to indicate good  
 171 reliability, and higher values indicate greater homogeneity. Outer loading ( $\geq 0.708$ ) and  
 172 Average Variance Extraction (AVE) ( $\geq 0.5$ ) were used to assess the convergence validity, while  
 173 the Cross Loading and Fornell-Larcker criteria were used to assess discriminant validity.

174 Good discriminant validity means that the outer loading of a measurement variable on its  
175 corresponding latent variable is greater than its cross loadings on other latent variables, or the  
176 square root of the *AVE* of each latent variable is greater than its linear correlation coefficients  
177 with any other latent variables. Path analysis of the latent variables and model prediction were  
178 used to evaluate the structural model [11]. The relationship between latent variables was  
179 evaluated by estimating direct effect, indirect effect, and total effect. The model prediction  
180 assessment indicators were the adjusted coefficient of determination ( $R_{adj}^2$ ) (In general,  $R_{adj}^2$   
181 values of 0.25, 0.50, and 0.75 for target constructs are considered weak, medium, and  
182 substantial, respectively.), the effect size ( $f^2$ ) (Results of 0.02, 0.15, and 0.35 are interpreted  
183 as small, medium, and large  $f^2$  effect sizes, respectively.), and the predictive relevance ( $Q^2$ )  
184 (The path model has predictive relevance for a selected endogenous construct if the  $Q^2$  value  
185 is above zero).

## 186 **Statistical analysis**

187 Second-order Partial Least Squares Structural Equation Model (PLS-SEM) was used to  
188 test the model's reliability and validity, and PLS-SEM Multigroup Analysis (PLS-MGA) was  
189 used to explore the heterogeneity between rural and urban participants. A two-tailed  $P \leq 0.05$   
190 was considered statistically significant. To be consistent with the international customer  
191 satisfaction index, a one hundred percentage point system was used to express the public  
192 satisfaction index (*PSI*).

193 The descriptive statistics and CTT analyses were conducted using SPSS 18.0. IRT  
194 analysis was performed using Mplus version 7.0. PLS-SEM and PLS-MGA analyses were  
195 conducted with SmartPLS 3.0.

196 **Results**

197 **Samples**

198 A total of 1909 participants who had insurance for their children were included in the  
 199 primary data analysis. Table 3 shows the sociodemographic information of pupils and main  
 200 decision makers for the model construction group and model validation group separately. For  
 201 pupils, the mean age was 9.26±1.75, and the frequency of male (945, 49.89%) and female  
 202 students (949, 50.11%) were similar. For the main decision makers, the mean age was  
 203 37.13±5.90 years; most of decision makers were parents of pupils (1845, 96.95%), especially  
 204 mothers (1196, 62.85%). Table 3 also indicates that there were no significant differences  
 205 between the two groups for both pupils and main decision makers , suggesting that the two  
 206 groups were homogenous. The measurement scores and comparative analysis between the  
 207 two groups are shown in S1 Table .

208 **Table 3 Sociodemographic information of the pupils and the main decision makers for**  
 209 **their BMI**

| Variables                             | Model construction<br>group ( n=574 ) | Model validation<br>group ( n=1335 ) | All<br>( n=1909 ) | Statistics | P     |
|---------------------------------------|---------------------------------------|--------------------------------------|-------------------|------------|-------|
| <b>Pupils</b>                         |                                       |                                      |                   |            |       |
| Age, Mean ± SD                        | 9.26±1.78                             | 9.27±1.74                            | 9.26±1.75         | 0.553      | 0.580 |
| Sex, n (%)                            |                                       |                                      |                   | 2.610      | 0.106 |
| male                                  | 299 (52.73%)                          | 646 (48.68%)                         | 945 (49.89%)      |            |       |
| female                                | 268 (47.27%)                          | 681 (51.32%)                         | 949 (50.11%)      |            |       |
| Sum                                   | 567 (100.00%)                         | 1327 (100.00%)                       | 1894 (100.00%)    |            |       |
| Health condition <sup>a</sup> , n (%) |                                       |                                      |                   | 0.957      | 0.339 |
| Very good                             | 323 (56.77%)                          | 728 (54.99%)                         | 1051 (55.52%)     |            |       |
| Good                                  | 222 (39.01%)                          | 529 (39.95%)                         | 751 (39.67%)      |            |       |
| General                               | 24 (4.22%)                            | 67 (5.06%)                           | 91 (4.81%)        |            |       |
| Sum                                   | 569 (100.00%)                         | 1324 (100.00%)                       | 1893 (100.00%)    |            |       |
| <b>Main decision maker</b>            |                                       |                                      |                   |            |       |

|                                          |               |                |                |       |       |
|------------------------------------------|---------------|----------------|----------------|-------|-------|
| <b>Age, Mean ± SD</b>                    | 37.24±5.79    | 37.07±5.88     | 37.13±5.90     | 0.121 | 0.904 |
| <b>Relationship with pupils, n (%)</b>   |               |                |                | 1.968 | 0.579 |
| Father                                   | 192 (33.62%)  | 457 (34.31%)   | 649 (34.10%)   |       |       |
| Mother                                   | 360 (63.05%)  | 836 (62.76%)   | 1196 (62.85%)  |       |       |
| Others                                   | 19 (3.33%)    | 39 (3.93%)     | 58 (3.05%)     |       |       |
| Sum                                      | 571 (100.00%) | 1332 (100.00%) | 1903 (100.00%) |       |       |
| <b>Sex, n (%)</b>                        |               |                |                | 0.055 | 0.815 |
| male                                     | 200 (35.03%)  | 474 (35.59%)   | 674 (35.42%)   |       |       |
| female                                   | 371 (64.97%)  | 858 (64.41%)   | 1229 (64.58%)  |       |       |
| Sum                                      | 571 (100.00%) | 1332 (100.00%) | 1903 (100.00%) |       |       |
| <b>Marital status<sup>b</sup>, n (%)</b> |               |                |                | —     | 0.764 |
| Married                                  | 552 (97.01%)  | 1275 (96.37%)  | 1827 (96.56%)  |       |       |
| Divorced                                 | 16 (2.81%)    | 40 (3.03%)     | 56 (2.96%)     |       |       |
| Never Married                            | 0 (0.00%)     | 4 (0.30%)      | 4 (0.22%)      |       |       |
| Others                                   | 1 (0.18%)     | 4 (0.30%)      | 5 (0.26%)      |       |       |
| Sum                                      | 569 (100.00%) | 1323 (100.00%) | 1892 (100.00%) |       |       |
| <b>Education<sup>a</sup>, n (%)</b>      |               |                |                | 3.230 | 0.520 |
| Junior high school and below             | 163 (29.00%)  | 372 (28.38%)   | 535 (28.56%)   |       |       |
| High or technical secondary school       | 239 (42.53%)  | 583 (44.47%)   | 822 (43.89%)   |       |       |
| Junior college                           | 94 (16.73%)   | 187 (14.26%)   | 281 (15.00%)   |       |       |
| Bachelor                                 | 57 (10.14%)   | 153 (11.67%)   | 210 (11.22%)   |       |       |
| Master or above                          | 9 (1.60%)     | 16 (1.22%)     | 25 (1.33%)     |       |       |
| Sum                                      | 562 (100.00%) | 1311 (100.00%) | 1873 (100.00%) |       |       |

210 <sup>a</sup> Kruskal-Wallis  $H$  test <sup>b</sup> Fisher's exact test

## 211 **Model construction**

212 S2 Table provided GRM estimations of the discrimination ( $a$ ) and threshold parameters

213 ( $b_1$ - $b_9$ ) as well as their standard errors (SE). Table 4 shows the results of measurement

214 variable selection with the CTT and IRT methods. Using these methods, the ceiling effect

215 selected 5 variables (PQ1, PQ14, PE2, PT1 and PT2), Cronbach's  $\alpha$  coefficient selected 1

216 variable (PS3),  $a$  selected 1 variable (PC1),  $b$  selected 9 variables (PQ9-PQ12, PQ16, PV1,

217 PV2, PS1 and PS2), and  $\bar{I}$  selected 4 variables (PQ1, PQ2, PC1, and PC2).

218

219 **Table 4 The results of measurement variable selection with the methods of CTT and IRT**

| Variables | CTT             |                   |               |                           |                           |                                    |                        | IRT                |          |          | Selecte<br>d |           |
|-----------|-----------------|-------------------|---------------|---------------------------|---------------------------|------------------------------------|------------------------|--------------------|----------|----------|--------------|-----------|
|           | Floor<br>effect | Ceiling<br>effect | <i>t-test</i> | Correlation<br>analysis 1 | Correlation<br>analysis 2 | Cronbach's $\alpha$<br>coefficient | Stepwise<br>regression | Factor<br>analysis | <i>a</i> | <i>b</i> |              | $\bar{I}$ |
| PQ1       |                 | x                 |               |                           |                           |                                    |                        |                    |          |          | x            | 2         |
| PQ2       |                 |                   |               |                           |                           |                                    |                        |                    |          |          | x            | 1         |
| PQ3       |                 |                   |               |                           |                           |                                    |                        |                    |          |          |              | 0         |
| PQ4       |                 |                   |               |                           |                           |                                    |                        |                    |          |          |              | 0         |
| PQ5       |                 |                   |               |                           |                           |                                    |                        |                    |          |          |              | 0         |
| PQ6       |                 |                   |               |                           |                           |                                    |                        |                    |          |          |              | 0         |
| PQ7       |                 |                   |               |                           |                           |                                    |                        |                    |          |          |              | 0         |
| PQ8       |                 |                   |               |                           |                           |                                    |                        |                    |          |          |              | 0         |
| PQ9       |                 |                   |               |                           |                           |                                    |                        |                    |          |          | x            | 1         |
| PQ10      |                 |                   |               |                           |                           |                                    |                        |                    |          |          | x            | 1         |
| PQ11      |                 |                   |               |                           |                           |                                    |                        |                    |          |          | x            | 1         |
| PQ12      |                 |                   |               |                           |                           |                                    |                        |                    |          |          | x            | 1         |
| PQ13      |                 |                   |               |                           |                           |                                    |                        |                    |          |          |              | 0         |
| PQ14      |                 | x                 |               |                           |                           |                                    |                        |                    |          |          |              | 1         |
| PQ15      |                 |                   |               |                           |                           |                                    |                        |                    |          |          |              | 0         |
| PQ16      |                 |                   |               |                           |                           |                                    |                        |                    |          |          | x            | 1         |
| PQ17      |                 |                   |               |                           |                           |                                    |                        |                    |          |          |              | 0         |
| PE1       |                 |                   |               |                           |                           |                                    |                        |                    |          |          |              | 0         |
| PE2       |                 | x                 |               |                           |                           |                                    |                        |                    |          |          |              | 1         |
| PE3       |                 |                   |               |                           |                           |                                    |                        |                    |          |          |              | 0         |
| PV1       |                 |                   |               |                           |                           |                                    |                        |                    |          |          | x            | 1         |
| PV2       |                 |                   |               |                           |                           |                                    |                        |                    |          |          | x            | 1         |
| PS1       |                 |                   |               |                           |                           |                                    |                        |                    |          |          | x            | 1         |
| PS2       |                 |                   |               |                           |                           |                                    |                        |                    |          |          | x            | 1         |



|     |   |   |  |  |   |  |  |  |   |   |   |
|-----|---|---|--|--|---|--|--|--|---|---|---|
| PS3 |   |   |  |  | x |  |  |  |   | 1 |   |
| PC1 | — | — |  |  |   |  |  |  | x | x | 2 |
| PC2 | — | — |  |  |   |  |  |  |   | x | 1 |
| PT1 |   |   |  |  |   |  |  |  |   |   | 1 |
| PT2 |   |   |  |  |   |  |  |  |   |   | 1 |

220 x Suggested deletion

221 Overall, no item reached deletion criteria 3 or more times. However, it can be seen that  
 222 the  $\bar{I}$  of PC2 is 0.005, suggesting that its contribution to the model is near 0, and its  
 223 discrimination is also low ( $\alpha$  is 0.351). In addition, with China's social and cultural  
 224 backgrounds, most enrollees will not formally complain even if they are dissatisfied. Thus,  
 225 the PC2 was deleted, and the remaining 28 variables were used to construct the  
 226 SIM-URRBMI ( Fig 2).

227 **Fig2 The final version of SIM\_URRBMI**

## 228 Model validation

### 229 Reliability

230 The Cronbach's  $\alpha$  coefficient for each of the latent variables ranged from 0.772 to 1.000,  
 231 and the composite reliability coefficients ranged from 0.897 to 1.000, both of which are  
 232 greater than 0.7, providing evidence that the revised SIM-URRBMI is reliable (see Table 5).

233 **Table 5 The reliability of the SIM-URRBMI**

| Latent variables | Cronbach's $\alpha$ coefficient | Composite reliability coefficient |
|------------------|---------------------------------|-----------------------------------|
| PQ               | 0.956                           | 0.960                             |
| PE               | 0.918                           | 0.948                             |
| PV               | 0.895                           | 0.950                             |
| PS               | 0.867                           | 0.919                             |
| PC               | 1.000                           | 1.000                             |
| PT               | 0.772                           | 0.897                             |
| PQ_overall       | 1.000                           | 1.000                             |
| PQ_information   | 0.796                           | 0.907                             |

---

|                |       |       |
|----------------|-------|-------|
| PQ_service     | 0.845 | 0.928 |
| PQ_policy      | 0.933 | 0.946 |
| PQ_institution | 0.926 | 0.944 |

---

234 **Validity**

235 The results of the convergent and discriminant validity of the revised SIM-URRBMI are  
236 summarized in Tables 6 - 8. The *AVEs* of all latent variables were greater than 0.5, and the  
237 outer factor loadings of all the measurement variables ranged from 0.726 to 1.000, except  
238 that the second-order external factor loadings for the PQ1, PQ2, and PQ3 variables (0.692,  
239 0.595 and 0.684, respectively) was slightly below the critical value of 0.7, showing good  
240 convergent validity. All of the outer loadings of the measurement variables on their  
241 corresponding latent variable were greater than their cross loadings on the other latent  
242 variables. The square roots of the *AVEs* for each latent variable were greater than the linear  
243 correlation of the latent variable with the other structures, except for the perceived quality  
244 variable, which has a slightly higher correlation with perceived value and public  
245 satisfaction (Table 8). The results indicate good discriminant validity. All but one of the paths  
246 were statistically significant and positive; the effect of public satisfaction on the public  
247 complaints was negative, which is in line with the model theory framework. Table 9 and S3  
248 Table show the result of the direct effects and the collinearity assessment of the  
249 SIM-URRBMI. Furthermore, the greatest effect of the five first-order latent variables on  
250 perceived quality was medical insurance policy quality (0.472) followed by institution quality  
251 (0.354) (see Table 9). All variance inflation factor (*VIF*) values are clearly below the threshold  
252 of 5. Therefore, collinearity among the predictor constructs is not an issue in the structural  
253 model. The two paths with the greatest direct effect were perceived quality on perceived value  
254 (0.676) and public satisfaction on public trust (0.634). S4 Table indicates the indirect effects

255 of the revised SIM-URBBI.

256

**Table 6 The convergent validity of the SIM-URRBMI**

| <b>Latent variables</b> | <b>Measurement variables</b> | <b>Outer factor loadings</b> | <b>Outer factor loadings (second order)</b> | <b>AVE</b> |
|-------------------------|------------------------------|------------------------------|---------------------------------------------|------------|
| PQ                      | —                            | —                            | —                                           | 0.590      |
| PQ_overall              | PQ1                          | 1.000                        | 0.692                                       | 1.000      |
| PQ_information          | PQ2                          | 0.898                        | 0.595                                       | 0.830      |
|                         | PQ3                          | 0.924                        | 0.684                                       |            |
| PQ_service              | PQ4                          | 0.930                        | 0.756                                       | 0.866      |
|                         | PQ5                          | 0.931                        | 0.761                                       |            |
|                         | PQ6                          | 0.788                        | 0.757                                       |            |
| PQ_policy               | PQ7                          | 0.783                        | 0.731                                       | 0.716      |
|                         | PQ8                          | 0.796                        | 0.750                                       |            |
|                         | PQ9                          | 0.901                        | 0.833                                       |            |
| PQ_policy               | PQ10                         | 0.903                        | 0.836                                       |            |
|                         | PQ11                         | 0.884                        | 0.832                                       |            |
|                         | PQ12                         | 0.859                        | 0.801                                       |            |
|                         | PQ13                         | 0.856                        | 0.783                                       |            |
|                         | PQ14                         | 0.836                        | 0.726                                       |            |
| PQ_institution          | PQ15                         | 0.912                        | 0.839                                       | 0.759      |
|                         | PQ16                         | 0.920                        | 0.844                                       |            |
|                         | PQ17                         | 0.869                        | 0.794                                       |            |
| PE                      | PE1                          | 0.921                        | —                                           | 0.859      |
|                         | PE2                          | 0.943                        | —                                           |            |
|                         | PE3                          | 0.916                        | —                                           |            |
| PV                      | PV1                          | 0.951                        | —                                           | 0.905      |
|                         | PV2                          | 0.952                        | —                                           |            |
| PS                      | PS1                          | 0.925                        | —                                           | 0.791      |
|                         | PS2                          | 0.928                        | —                                           |            |
|                         | PS3                          | 0.811                        | —                                           |            |
| PC                      | PC1                          | 1.000                        | —                                           | 1.000      |
| PT                      | PT1                          | 0.887                        | —                                           | 0.813      |
|                         | PT2                          | 0.916                        | —                                           |            |

257

**Table 7 Outer factor loadings and cross loadings of measurement variables for**

258

**theSIM-URBBI**

| Variables | PQ <sub>overall</sub> | PQ <sub>information</sub> | PQ <sub>service</sub> | PQ <sub>policy</sub> | PQ <sub>institution</sub> | PQ <sub>(second order)</sub> | PE           | PV           | PS           | PC           | PT           |
|-----------|-----------------------|---------------------------|-----------------------|----------------------|---------------------------|------------------------------|--------------|--------------|--------------|--------------|--------------|
| PQ1       | <b>1.000</b>          | 0.499                     | 0.582                 | 0.586                | 0.597                     | <b>0.692</b>                 | 0.427        | 0.561        | 0.584        | -0.224       | 0.474        |
| PQ2       | 0.428                 | <b>0.898</b>              | 0.496                 | 0.515                | 0.439                     | <b>0.595</b>                 | 0.287        | 0.444        | 0.460        | -0.118       | 0.305        |
| PQ3       | 0.479                 | <b>0.924</b>              | 0.619                 | 0.588                | 0.529                     | <b>0.684</b>                 | 0.333        | 0.482        | 0.515        | -0.132       | 0.375        |
| PQ4       | 0.577                 | 0.544                     | <b>0.930</b>          | 0.595                | 0.703                     | <b>0.756</b>                 | 0.440        | 0.565        | 0.597        | -0.216       | 0.467        |
| PQ5       | 0.507                 | 0.603                     | <b>0.931</b>          | 0.645                | 0.645                     | <b>0.761</b>                 | 0.434        | 0.568        | 0.604        | -0.204       | 0.416        |
| PQ6       | 0.533                 | 0.546                     | 0.610                 | <b>0.788</b>         | 0.584                     | <b>0.757</b>                 | 0.448        | 0.596        | 0.624        | -0.196       | 0.439        |
| PQ7       | 0.442                 | 0.537                     | 0.566                 | <b>0.783</b>         | 0.556                     | <b>0.731</b>                 | 0.389        | 0.540        | 0.591        | -0.190       | 0.392        |
| PQ8       | 0.505                 | 0.478                     | 0.514                 | <b>0.796</b>         | 0.612                     | <b>0.750</b>                 | 0.455        | 0.671        | 0.633        | -0.267       | 0.524        |
| PQ9       | 0.521                 | 0.516                     | 0.578                 | <b>0.901</b>         | 0.666                     | <b>0.833</b>                 | 0.394        | 0.674        | 0.698        | -0.260       | 0.476        |
| PQ10      | 0.512                 | 0.500                     | 0.565                 | <b>0.903</b>         | 0.681                     | <b>0.836</b>                 | 0.421        | 0.680        | 0.708        | -0.238       | 0.520        |
| PQ11      | 0.494                 | 0.522                     | 0.570                 | <b>0.884</b>         | 0.690                     | <b>0.832</b>                 | 0.409        | 0.681        | 0.684        | -0.262       | 0.504        |
| PQ12      | 0.463                 | 0.502                     | 0.544                 | <b>0.859</b>         | 0.658                     | <b>0.801</b>                 | 0.366        | 0.652        | 0.672        | -0.280       | 0.481        |
| PQ13      | 0.490                 | 0.456                     | 0.675                 | 0.644                | <b>0.856</b>              | <b>0.783</b>                 | 0.493        | 0.590        | 0.650        | -0.213       | 0.517        |
| PQ14      | 0.507                 | 0.418                     | 0.583                 | 0.573                | <b>0.836</b>              | <b>0.726</b>                 | 0.478        | 0.565        | 0.597        | -0.193       | 0.503        |
| PQ15      | 0.546                 | 0.505                     | 0.653                 | 0.706                | <b>0.912</b>              | <b>0.839</b>                 | 0.521        | 0.678        | 0.735        | -0.237       | 0.568        |
| PQ16      | 0.553                 | 0.507                     | 0.663                 | 0.706                | <b>0.920</b>              | <b>0.844</b>                 | 0.534        | 0.693        | 0.747        | -0.255       | 0.575        |
| PQ17      | 0.526                 | 0.458                     | 0.608                 | 0.671                | <b>0.869</b>              | <b>0.794</b>                 | 0.535        | 0.629        | 0.671        | -0.207       | 0.539        |
| PE1       | 0.397                 | 0.332                     | 0.449                 | 0.448                | 0.559                     | 0.534                        | <b>0.921</b> | 0.537        | 0.546        | -0.083       | 0.486        |
| PE2       | 0.391                 | 0.297                     | 0.444                 | 0.437                | 0.542                     | 0.517                        | <b>0.943</b> | 0.547        | 0.541        | -0.074       | 0.491        |
| PE3       | 0.400                 | 0.322                     | 0.411                 | 0.468                | 0.520                     | 0.524                        | <b>0.916</b> | 0.544        | 0.531        | -0.052       | 0.454        |
| PV1       | 0.540                 | 0.484                     | 0.577                 | 0.726                | 0.685                     | 0.755                        | 0.556        | <b>0.951</b> | 0.795        | -0.293       | 0.601        |
| PV2       | 0.528                 | 0.485                     | 0.581                 | 0.721                | 0.684                     | 0.752                        | 0.557        | <b>0.952</b> | 0.807        | -0.264       | 0.589        |
| PS1       | 0.581                 | 0.493                     | 0.629                 | 0.741                | 0.754                     | 0.797                        | 0.559        | 0.831        | <b>0.925</b> | -0.297       | 0.598        |
| PS2       | 0.544                 | 0.513                     | 0.616                 | 0.743                | 0.729                     | 0.787                        | 0.528        | 0.791        | <b>0.928</b> | -0.276       | 0.563        |
| PS3       | 0.419                 | 0.420                     | 0.462                 | 0.583                | 0.571                     | 0.615                        | 0.461        | 0.604        | <b>0.811</b> | -0.212       | 0.526        |
| PC1       | -0.275                | -0.169                    | -0.277                | -0.351               | -0.310                    | -0.351                       | -0.093       | -0.359       | -0.364       | <b>1.000</b> | -0.251       |
| PT1       | 0.389                 | 0.298                     | 0.390                 | 0.472                | 0.520                     | 0.520                        | 0.456        | 0.509        | 0.530        | -0.142       | <b>0.887</b> |
| PT2       | 0.462                 | 0.376                     | 0.461                 | 0.542                | 0.587                     | 0.600                        | 0.472        | 0.613        | 0.607        | -0.223       | <b>0.916</b> |

259

The bold number in the table is the external factor loadings of the measurement variable on its

260

corresponding latent variable, and the rest are the cross loadings.

261

**Table 8 The Fornell-Larcker standard for the SIM-URRBMI**

|                 | PQ           | PQ_ overall<br>1 | PQ_ information | PQ_ service  | PQ_ policy   | PQ_ institution | PE           | PV           | PS           | PC           | PT           |
|-----------------|--------------|------------------|-----------------|--------------|--------------|-----------------|--------------|--------------|--------------|--------------|--------------|
| PQ              | <b>0.768</b> |                  |                 |              |              |                 |              |              |              |              |              |
| PQ_ overall     | 0.692        | <b>1.000</b>     |                 |              |              |                 |              |              |              |              |              |
| PQ_ Information | 0.705        | 0.499            | <b>0.911</b>    |              |              |                 |              |              |              |              |              |
| PQ_ service     | 0.815        | 0.582            | 0.616           | <b>0.931</b> |              |                 |              |              |              |              |              |
| PQ_ policy      | 0.937        | 0.586            | 0.608           | 0.666        | <b>0.846</b> |                 |              |              |              |              |              |
| PQ_ institution | 0.908        | 0.597            | 0.534           | 0.724        | 0.753        | <b>0.879</b>    |              |              |              |              |              |
| PE              | 0.567        | 0.427            | 0.342           | 0.470        | 0.486        | 0.583           | <b>0.927</b> |              |              |              |              |
| PV              | 0.792        | 0.561            | 0.510           | 0.609        | 0.760        | 0.720           | 0.585        | <b>0.951</b> |              |              |              |
| PS              | 0.830        | 0.584            | 0.536           | 0.646        | 0.780        | 0.776           | 0.582        | 0.842        | <b>0.890</b> |              |              |
| PC              | -0.286       | -0.224           | -0.138          | -0.226       | -0.286       | -0.252          | -0.076       | -0.293       | -0.297       | <b>1.000</b> |              |
| PT              | 0.623        | 0.474            | 0.376           | 0.475        | 0.565        | 0.616           | 0.515        | 0.625        | 0.633        | -0.205       | <b>0.902</b> |

262 The bolded numbers in the diagonal of the table are the square roots of AVE for each latent  
 263 variable

264

**Table 9 The direct effects in the SIM-URRBMI**

| Direct path       | Coefficient | SE    | t      | P      | 95%CI  |        |
|-------------------|-------------|-------|--------|--------|--------|--------|
|                   |             |       |        |        | Lower  | Upper  |
| PE→PQ             | 0.568       | —     | —      | —      | —      | —      |
| PE→PV             | 0.204       | 0.027 | 7.372  | <0.001 | 0.145  | 0.253  |
| PE→PS             | 0.070       | 0.021 | 3.362  | 0.001  | 0.034  | 0.119  |
| PQ→PV             | 0.676       | 0.021 | 31.964 | <0.001 | 0.639  | 0.720  |
| PQ→PS             | 0.421       | 0.028 | 14.960 | <0.001 | 0.361  | 0.474  |
| PV→PS             | 0.467       | 0.032 | 14.698 | <0.001 | 0.404  | 0.528  |
| PS→PC             | -0.243      | 0.020 | 11.847 | <0.001 | -0.280 | -0.202 |
| PS→PT             | 0.634       | 0.020 | 31.305 | <0.001 | 0.596  | 0.674  |
| PE→PQ_overall     | 0.428       | 0.027 | 15.651 | <0.001 | 0.373  | 0.477  |
| PE→PQ_information | 0.344       | 0.026 | 12.981 | <0.001 | 0.290  | 0.393  |
| PE→PQ_service     | 0.471       | 0.026 | 18.247 | <0.001 | 0.413  | 0.518  |
| PE→PQ_policy      | 0.487       | 0.025 | 19.415 | <0.001 | 0.437  | 0.534  |
| PE→PQ_institution | 0.584       | 0.023 | 25.431 | <0.001 | 0.534  | 0.624  |
| PQ_overall→PQ     | 0.069       | 0.002 | 36.692 | <0.001 | 0.066  | 0.073  |
| PQ_information→PQ | 0.110       | 0.003 | 31.786 | <0.001 | 0.103  | 0.117  |
| PQ_service→PQ     | 0.135       | 0.003 | 47.898 | <0.001 | 0.130  | 0.142  |
| PQ_policy→PQ      | 0.472       | 0.006 | 76.267 | <0.001 | 0.462  | 0.485  |
| PQ_institution→PQ | 0.354       | 0.005 | 64.894 | <0.001 | 0.343  | 0.364  |

265 The total effect of the 14 paths of the SIM-URRBMI were statistically significant,  
 266 showing that the model was constructed properly (see Table 10). The three strongest paths  
 267 were (1) perceived quality on public satisfaction (with a total effect of 0.737, a direct effect of  
 268 0.421 and an indirect effect of 0.316); (2) perceived quality on perceived value (with a total  
 269 effect of 0.676); and (3) public satisfaction on public trust (with a total effect of 0.634). The  
 270 largest total effect of the five explanatory variables of public trust was calculated for public  
 271 satisfaction (0.634), followed by perceived quality (0.467). Among the three explanatory  
 272 variables of public satisfaction, the greatest total effect was from perceived quality (0.737).

273 **Table 10 The results of the total effect analysis for the SIM-URRBMI**

| Total path         | Coefficient | SE    | t      | P      | 95%CI  |        |
|--------------------|-------------|-------|--------|--------|--------|--------|
|                    |             |       |        |        | Lower  | Upper  |
| PE→PQ <sup>a</sup> | 0.568       | 0.022 | 25.377 | <0.001 | 0.519  | 0.609  |
| PE→PQ              | 0.588       | 0.025 | 23.122 | <0.001 | 0.535  | 0.637  |
| PE→PS              | 0.584       | 0.024 | 23.953 | <0.001 | 0.535  | 0.630  |
| PE→PC <sup>b</sup> | -0.142      | 0.013 | 10.963 | <0.001 | -0.168 | -0.116 |
| PE→PT <sup>b</sup> | 0.371       | 0.023 | 16.142 | <0.001 | 0.322  | 0.409  |
| PQ→PV <sup>a</sup> | 0.676       | 0.021 | 31.964 | <0.001 | 0.639  | 0.720  |
| PQ→PS              | 0.737       | 0.018 | 41.270 | <0.001 | 0.699  | 0.771  |
| PQ→PC <sup>b</sup> | -0.179      | 0.016 | 10.870 | <0.001 | -0.210 | -0.143 |
| PQ→PT <sup>b</sup> | 0.467       | 0.018 | 25.732 | <0.001 | 0.430  | 0.502  |
| PV→PS <sup>a</sup> | 0.467       | 0.032 | 14.698 | <0.001 | 0.404  | 0.528  |
| PV→PC <sup>b</sup> | -0.113      | 0.013 | 9.010  | <0.001 | -0.139 | -0.090 |
| PV→PT <sup>b</sup> | 0.297       | 0.023 | 13.161 | <0.001 | 0.252  | 0.336  |
| PS→PC <sup>a</sup> | -0.243      | 0.020 | 11.847 | <0.001 | -0.280 | -0.202 |
| PS→PT              | 0.634       | 0.020 | 31.305 | <0.001 | 0.596  | 0.674  |

274 <sup>a</sup> indicates that only the direct path was set, <sup>b</sup> indicates that only the indirect path was set

275

276 The adjusted coefficients of determination ( $R_{adj}^2$ ) of each endogenous latent variable  
 277 ranged from 0.088 to 1.000. The  $R_{adj}^2$  values were 0.783 and 0.400 for public satisfaction  
 278 and public trust, respectively, indicating a strong and moderate prediction. The effect size ( $f^2$ )

279 ranged from 0.014 to 0.903; the  $f^2$  values for perceived quality on predicted perceived value,  
 280 the perceived value on predicted public satisfaction, and public satisfaction on predicted  
 281 public trust were 0.903, 0.351 and 0.667, respectively; all were greater than 0.35 indicating a  
 282 strong predictive effect. The predictive relevance ( $Q^2$ ) of all endogenous latent variables was  
 283 greater than 0, ranging from 0.105 to 0.585, showing a certain predictive relevance for all five  
 284 endogenous latent variables (see Table 11).

285 **Table 11 The results of predictive ability evaluation for the SIM-URRBMI**

|                 |                                      | PE | PQ    | PV    | PS    | PC    | PT    |
|-----------------|--------------------------------------|----|-------|-------|-------|-------|-------|
|                 | $R_{adj}^2$                          | —  | 1.000 | 0.654 | 0.783 | 0.088 | 0.400 |
|                 | The predictive correlation ( $Q^2$ ) | —  | 0.550 | 0.567 | 0.585 | 0.105 | 0.311 |
|                 | PE                                   | —  | —     | 0.080 | 0.014 | —     | —     |
|                 | PQ                                   | —  | —     | 0.903 | 0.290 | —     | —     |
| The effect      | PV                                   | —  | —     | —     | 0.351 | —     | —     |
| scale ( $f^2$ ) | PS                                   | —  | —     | —     | —     | 0.097 | 0.667 |
|                 | PC                                   | —  | —     | —     | —     | —     | —     |
|                 | PT                                   | —  | —     | —     | —     | —     | —     |

286 **Model application**

287 The SIM-URRBMI satisfaction index scores were 57.29 and 58.17 for rural and urban  
 288 participants, respectively. PLS-MGA showed that the total effect of public expectation on  
 289 public satisfaction and public complaints was higher for citizens than for rural residents  
 290 (0.627 vs 0.534,  $P=0.037$ ; -0.166 vs -0.114,  $P=0.042$ ). The total effect of perceived quality on  
 291 public trust for citizens was lower than that of rural residents (0.429 vs 0.514,  $P=0.023$ ) (see  
 292 Table 12).

293  
 294  
 295

296 **Table12** Comparison of total effects between urban and rural residents' among latent variables



| Total path | Rural areas |               | Urban areas |               | Rural vs Urban        |       |       |
|------------|-------------|---------------|-------------|---------------|-----------------------|-------|-------|
|            | $p^{(1)}$   | $se(p^{(1)})$ | $p^{(2)}$   | $se(p^{(2)})$ | $ p^{(1)} - p^{(2)} $ | $t$   | $P$   |
| PE→PQ      | 0.548       | 0.034         | 0.588       | 0.028         | 0.042                 | 0.954 | 0.340 |
| PE→PQ      | 0.568       | 0.036         | 0.610       | 0.032         | 0.040                 | 0.834 | 0.404 |
| PE→PS      | 0.534       | 0.036         | 0.627       | 0.029         | 0.095                 | 2.087 | 0.037 |
| PE→PC      | -0.114      | 0.016         | -0.166      | 0.020         | 0.052                 | 2.034 | 0.042 |
| PE→PT      | 0.360       | 0.033         | 0.378       | 0.029         | 0.019                 | 0.442 | 0.659 |
| PQ→PV      | 0.697       | 0.032         | 0.662       | 0.030         | 0.032                 | 0.724 | 0.469 |
| PQ→PS      | 0.762       | 0.025         | 0.714       | 0.025         | 0.048                 | 1.380 | 0.168 |
| PQ→PC      | -0.164      | 0.024         | -0.189      | 0.023         | 0.026                 | 0.773 | 0.440 |
| PQ→PT      | 0.514       | 0.027         | 0.429       | 0.025         | 0.083                 | 2.277 | 0.023 |
| PV→PS      | 0.499       | 0.042         | 0.448       | 0.043         | 0.056                 | 0.920 | 0.358 |
| PV→PC      | -0.107      | 0.018         | -0.119      | 0.017         | 0.011                 | 0.442 | 0.659 |
| PV→PT      | 0.336       | 0.032         | 0.270       | 0.030         | 0.069                 | 1.589 | 0.112 |
| PS→PC      | -0.214      | 0.029         | -0.265      | 0.029         | 0.051                 | 1.229 | 0.219 |
| PS→PT      | 0.674       | 0.028         | 0.602       | 0.029         | 0.071                 | 1.741 | 0.082 |

297

## 298 **Discussion**

299       China's medical reform has entered a critical period, there is an urgent need to understand  
300 participants' satisfaction with BMI and to determine the main aspects that need improvement.  
301 This work will provide important evidence for the performance improvement of the insurance  
302 schemes and provide a critical reference for reform [4]. After more than 60 years of reform  
303 and construction, China has finally established a basic medical insurance system that covers  
304 the entire population for basic medicine. To meet participants' growing basic need for a better  
305 life, it is necessary to continuously improve the quality of universal medical insurance from  
306 the perspective of the insured [17].

307       Moreover, the quality of medical insurance determines the satisfaction of the insured to a  
308 large extent. The original SIM-URRBMI developed by Peng et al has provide a standard  
309 measurement of satisfaction, but could not provide detailed information for the diagnosis of  
310 poor quality as there were few detailed quality items. This study constructed the perceived  
311 quality variable as a second-order latent variable based on the literature review and expert  
312 consultation. The second-order SEM can not only reduce the number of structural model  
313 relationships but also make the model path more concise and easier to understand. Most  
314 importantly, it can measure the quality perception of URRBMI participants more accurately.  
315 This characteristic will greatly help identify the aspects of URRBMI that are in urgent need of  
316 improvement [18]. The results of the predictive ability evaluation showed that the  $R_{adj}^2$  of  
317 PS was 0.783, which is larger than the  $R^2$  of PS in the original version of SIM-URRBMI  
318 constructed by Peng et al. (0.63). From this point of view, it appears that the construction of  
319 PQ as a second-order latent variable in this study increased the predictive power of public

320 satisfaction. This also verifies our hypothesis that the quality-refined model can measure PS  
321 more accurately.

322 Additionally, this study also tested the path effect differences between rural and urban  
323 participants; thus, it can not only reveal population heterogeneity in structural models but also  
324 help identify the preferred path for quality and satisfaction improvement in a certain subgroup  
325 population.

326 The measurement variables selection is a key step in model construction. CTT and IRT  
327 complementary each other, combining both methods in measurement variable selection will  
328 provide more stable and reliable choices and benefits for model construction. The result of  
329 measurement variable selection revealed that the measurement variable PC2 (formal  
330 complaint) had poor performance. It is consistent with Chinese cultural backgrounds that the  
331 public seldom choose this method to express their dissatisfaction with public services.  
332 Deletion of PC2 suggested that this study had a good rationale for its measurement variable  
333 selection methods [19].

334 The Cronbach's  $\alpha$  coefficients and composite reliability coefficients for all latent  
335 variables were greater than 0.7, suggesting good internal consistency. except for the  
336 perceived quality variable, which was slightly less than the linear correlation coefficient  
337 between the perceived value and public satisfaction variables (One possible reason is that the  
338 second-order external factor loadings for the PQ1-PQ3 variables were less than 0.7), all the  
339 other results indicate that the model has good convergent validity and discriminant  
340 validity. The total effect of perceived quality on public satisfaction is 0.737, which has the  
341 largest total effect among all latent variables, indicating that PQ is the most important factor

342 affecting public satisfaction, which is consistent with the research conducted by Lang Xu and  
343 Fornell C in the medical insurance field and Johnson MD in other research fields [20-21].  
344 First, from the results of the path coefficients between perceived quality and its first-order  
345 latent variables, it was seen that the quality of medical insurance policy had the greatest  
346 impact on PQ with a total effect of 0.472, suggesting that medical insurance policy had the  
347 greatest impact on public satisfaction. Second, PQ9 (basic coverage scope), PQ10  
348 (coinsurance), PQ11 (deductible) and PQ12 (capitation) had larger second-order factor  
349 loadings on PQ. Moreover, PQ9-PQ12 had larger discrimination parameters (2.4-2.8) from  
350 the IRT *IIF* results. According to Juxiang Qin's point of view, the discrimination parameter  
351 reflects the sensitivity, which can distinguish the sensitivity of all the participants' responses  
352 to the question (that is, whether the project is a concern shared by everyone), and the *IIF*  
353 result reflects that the insured residents are more concerned about the policies related to  
354 reimbursement [22]. Therefore, reimbursement policy for URRBMI has the greatest impact  
355 on the satisfaction of the insured residents, suggesting that the improvement of quality,  
356 especially the medical insurance reimbursement policy quality, is crucial to improving  
357 satisfaction with URRBMI.

358 The SIM-URRBMI satisfaction index score of the main family decision makers for the  
359 pupils' BMI in Changsha was 57.59, which was lower than the satisfaction scores of the  
360 insured farmers on the NCMS in 2014 (66.33) and the US federal government satisfaction  
361 index scores (69.70) in 2017 [21, 23]. The satisfaction index score can also be used as a  
362 vertical comparison tool for the satisfaction research for URRBMI assessment. The  
363 satisfaction index scores were 57.29 and 58.17 in the rural and urban areas, respectively,

364 indicating that the urban residents had a slightly higher satisfaction level of URRBMI in  
365 Changsha, which is consistent with the research conducted by Fan Yan et al.[24]. The  
366 PLS-MGA result showed that, compared to the rural residents, urban participants had a higher  
367 total effect of PE on both PS and PC, while having a lower total effect of PQ on PT. PE is a  
368 kind of expectation for future medical insurance policies based on past consumption  
369 experiences. The urban residents had better policy welfare than the rural residents before the  
370 consolidation. Thus, urban residents had higher expectations for URRBMI, and whether the  
371 expectation is close or far from the actual situation, they may have, accordingly, had higher  
372 positive effects (satisfaction) or negative effects (complaints) than rural residents.

373       There are also some limitations of this research. First, the sample population was the  
374 main family decision makers for pupils' URRBMI and did not involve the other URRBMI  
375 participants in the family (such as college students). The conclusion is limited to the entire  
376 insured population. It is hoped that different insured populations can be included in future  
377 stages to expand the applicability of the model. Second, this study is a cross-sectional study  
378 that did not collect longitudinal data and, thus, could not estimate trends in URRBMI  
379 satisfaction in the sample area.

## 380 **Conclusions**

381       The final version of the SIM-URRBMI consists of 28 measurement variables and 11  
382 latent variables. It is a reliable and valid satisfaction measurement tool with good prediction  
383 ability for public satisfaction and public trust. In addition, the model provides accurate  
384 assessment for perceived quality of URRBMI, which will greatly help for performance  
385 improvement.

## 386 **Acknowledgements**

387       The authors would like to thank all the participants, teachers, and leaders in the selected  
388 8 primary schools, Liuyang City Center For Disease Control and Prevention and Tianxin  
389 District Education Bureau.

## 390 **References:**

- 391 1. Jing LM, Chen R, Jing L, Qiao Y. Development and enrollee satisfaction with basic  
392 medical insurance in China: A systematic review and stratified cluster sampling survey.  
393 Int J Health Plann Manage. 2017;32(3):285-298.
- 394 2. Pan XF, Xu J, Meng Q. Integrating social health insurance systems in China. Lancet  
395 2016;387(10025):1274-1275.
- 396 3. Zhu K, Zhang L, Yuan S, Zhang X, Zhang Z. Health financing and integration of urban  
397 and rural residents' basic medical insurance systems in China. Int J Equity Health.  
398 2017;16(1):194.
- 399 4. Mohammed S, Sambo MN, Dong HJ. Understanding client satisfaction with a health  
400 insurance scheme in Nigeria: factors and enrollees experiences. Health Res Policy Syst.  
401 2011;9(1):1-8.

- 402 5. Duan JM. [Research on Satisfaction of Medical Insurance in Rural Immigrant  
403 Community in Guazhou County]. Gansu Agricultural University; 2016.Chinese.
- 404 6. Fornell C, Johnson M, Anderson EW, Cha J, Bryant BE. The American Customer  
405 Satisfaction Index: Nature, Purpose, and Findings. *J Mark.* 1996;60(4):7-18.
- 406 7. Wang Q, Mo XK, Peng LA. [Evaluation of a Satisfaction Index Model for Pupils with  
407 Basic Medical Insurance for rural and Urban residents]. *Chinese Journal of Health  
408 Statistics* 2015;32(1):37-40. Chinese.
- 409 8. Peng LA, Mo XK, Shi JC, Lei SY. [Construction of a Satisfaction Index Model for Pupils  
410 with Basic Medical Insurance for rural and Urban residents: Model Item Selection].  
411 *Chinese Journal of Health Statistics* 2013;30(1):532-535+539. Chinese.
- 412 9. Fornell C National Customer Satisfaction Barometer: The Swedish Experience. *J Mark.*  
413 1992;56(1):6-21.
- 414 10. Choi KS, Cho WH, Lee S, Lee H, Kim C. The relationships among quality, value,  
415 satisfaction and behavioral intention in health care provider choice: A South Korean  
416 study. *J Bus Res.* 2004;57(8):913-921.
- 417 11. Hair JF, Hult GTM, Ringle CM, Sarstedt M. A Primer on Partial Least Squares Structural  
418 Equation Modeling (PLS-SEM). 2nd Ed ed: Thousand Oaks: SAGE; 2016.
- 419 12. Embretson B S E, Reise S P. Item response theory for psychologists. Mahwah: Lawrence  
420 Erlbaum, 2000.
- 421 13. Westland JC. Lower Bounds on Sample Size in Structural Equation Modeling. *Electron  
422 Commer Res Appl.* 2012;9(6):476-487.
- 423 14. Vinzi VE, Chin WW, Henseler J, Wang H. Handbook of Partial Least Squares: Concepts,

- 424           Methods and Applications. Berlin, Heidelberg, Springer; 2010.
- 425    15. Dani VV. Measuring Customer Satisfaction for F&B Chains in Pune Using ACSI Model.
- 426           Procedia Soc Behav Sci. 2014;133:465-472.
- 427    16. Qi SQ, Dai HQ. [Item Response Theory and Its Application Research]. Nanjing: Press of
- 428           Jiangxi education; 1992. Chinese.
- 429    17. Wang ZF. [Functional Positioning and Governance Mechanism of Medical
- 430           Insurance—Thoughts on Establishing National Medical Security Bureau]. Chin Heal
- 431           Insur. 2018(04):13-17. Chinese.
- 432    18. Ketchen, David J. A Primer on partial least squares structural equation modeling
- 433           (pls-sem). Long Range Plann. 2014;46(s1-2):184-185.
- 434    19. Sun ZQ, Xu YY. [Medical Statistics]. Fourth Edition ed. Beijing: People's Medical
- 435           Publishing House; 2014. Chinese.
- 436    20. Jonhson M, Gustafsson A, Andreassen TW, Lervik L, Cha J. The evolution and future of
- 437           national customer satisfaction index models. J Econ Psychol. 2001;22(2):217-245.
- 438    21. Xu L, Wang SL, Cao L. [Research on Satisfaction of new rural cooperative medical
- 439           system of farmers in Jiaozuo City of Henan Province]. Journal of Zhejiang Agricultural
- 440           Sciences. 2014(10):1643-1648. Chinese.
- 441    22. Qin JX. [Studies of Happiness Based on Item Response Theory]. Southwest University;
- 442           2016. Chinese.
- 443    23. ACSI 2017. ACSI Federal Government Report 2017 [Internet]. USA; 2017[cited 2
- 444           019 Mar 20]. Available from: [https://www.theacsi.org/news-and-resources/customer-s](https://www.theacsi.org/news-and-resources/customer-satisfaction-reports/report-archive/acsi-federal-government-report-2017)
- 445           [atisfaction-reports/report-archive/acsi-federal-government-report-2017](https://www.theacsi.org/news-and-resources/customer-satisfaction-reports/report-archive/acsi-federal-government-report-2017).



446 24. Yan F, Ma GD, Pan JJ, Xu N, Gu Y, Sun YF. [Investigation on satisfaction of overall  
447 urban and rural residents after participating basic medical insurance]. St Sci Health.  
448 2018;32(01):39-41. Chinese.

## 449 **Supporting information**

450 **S1 Table. The measurement scores and comparative analysis between two groups of the**

451 **initial draft of SIM\_URRBMI.**

452 **S2 Table. Item parameter estimation from the GRM.**

453 **S3 Table. The result of the collinearity assessment in the revised SIM\_URRBMI.**

454 **S4 Table. The indirect effects in the revised SIM\_URRBMI.**

## 455 **Funding**

456 This work was supported by the project of "13th five year plan" of Hunan Education

457 Science in 2019 (XJK19BGD003) , the China Community Health Services & Health

458 Education Program (2014CC03), and education and teaching reform research project of

459 Central South University in 2019 (2019jy146).

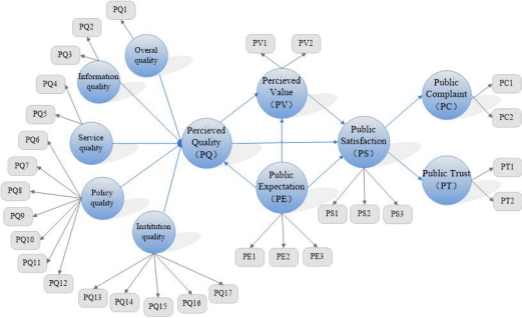

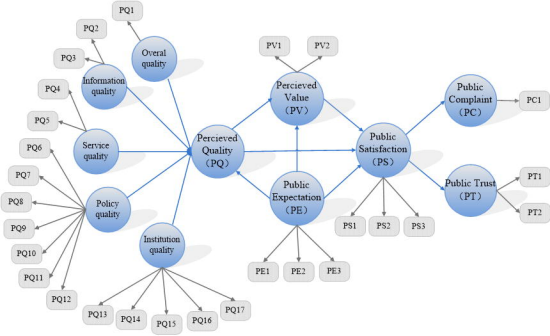

Source: https://www.medrxiv.org/content/medrxiv/early/2020/05/25/2020.05.23.20108779.full.pdf
